# Supplementary material
Source: publisher figshare collection journal article supplement (https://acs.figshare.com/ndownloader/files/31451007)
Supplement: Supplementary file 1 [file 31451007]

## Supporting Information

# In Situ Polymerization of Polypyrrole and Polyaniline on the Surface of Magnetic Molybdenum Trioxide Nanoparticles: Implications for Water Treatment

*Sofia K. Fanourakis<sup>1,‡</sup>, Sharona Q. Barroga<sup>2,3,‡</sup>, Jem Valerie D. Perez<sup>2</sup>, Lilin He<sup>4\*</sup>, and Debora F. Rodrigues<sup>1,5\*</sup>*

<sup>1</sup> Department of Materials Science and Engineering, University of Houston, Houston, TX 77204 – 4003, USA

<sup>2</sup> Department of Chemical Engineering, University of the Philippines, 1101 Diliman, Quezon City, Philippines

<sup>3</sup> Department of Chemical Engineering, Mariano Marcos State University, 2906 Batac, Ilocos Norte, Philippines

<sup>4</sup> Neutron Scattering Division, Oak Ridge National Laboratory, Oak Ridge, Tennessee 37831-6393, USA

<sup>5</sup> Department of Civil and Environmental Engineering, University of Houston, Houston, TX 77204 – 4003, USA

\*Emails: dfrigirodrigues@uh.edu; he3@ornl.gov

## Experimental Design and Statistical Analysis using RSM

The Design Expert (DE) software was used to generate the total number of experiments, analyze the experimental data, and acquire the relationship between the different input parameters and output responses. The DE software estimates statistical parameters to assess the validity of the resulting models using Analysis of Variance (ANOVA).

For the synthesis of PPy@MoO<sub>3</sub>@Fe<sub>3</sub>O<sub>4</sub> (PMF1) and PPy@MoO<sub>3</sub>@Fe<sub>3</sub>O<sub>4</sub> (PMF2) sets of experiments were generated using this software. The experiments were carried out and the output responses for each respective experiment was added to the software. Models were generated by the software using reduced quadratic type modeling. Statistical significance was ensured for each term in each model using an  $\alpha$  of 0.05 and by ensuring the lack of fit was insignificant. Furthermore, we ensured that the resulting F-values were greater than 25 for each model indicating that the signal to noise ratio was high enough to allow us to use the resulting models to predict our optimum material. Equations 1-6 describe the resulting models for each of the material and output responses as second-order equations for methylene blue (MB) dye removal and dissolution in terms of coded factors.

$$\text{PMF1 \% MB Dye Removal (Dark)} = 60.46 - 0.0642A + 5.10B - 10.09C + 9.67AB - 10.40A^2 - 21.92B^2 \quad (1)$$

$$\text{PMF1 \% MB Dye Removal (Light)} = 81.25 + 3.75A + 2.80B - 11.81C + 16.63AB + 5.68BC - 16.92A^2 - 14.33B^2 + 7.37C^2 \quad (2)$$

$$\text{PMF1 \% Dissolution} = 11.48 - 1.23A - 1.10B - 1.26C - 8.52AC - 5.45B^2 \quad (3)$$

$$\text{PMF2 \% MB Dye Removal (Dark)} = 75.72 + 2.59A - 48.4D + 4.11AD + 16.52A^2 - 71.68D^2 + 52.87A^2D \quad (4)$$

$$\text{PMF2 \% MB Dye Removal (Light)} = 81.46 + 5.36A - 100.80D + 5.60AD + 64.48A^2 - 122.14D^2 + 107.57A^2D \quad (5)$$

$$\text{PMF2 \% Dissolution} = 9.86 + 4.62A + 4.38D + 4.44AD - 5.36A^2 \quad (6)$$

where A is the amount of ammonium molybdate tetrahydrate (AMT), B is the amount of Fe<sub>3</sub>O<sub>4</sub>, C is the volume of pyrrole monomer, D is the amount of MoO<sub>3</sub>@Fe<sub>3</sub>O<sub>4</sub> (MF), AB is the interaction between the amount of AMT and amount of Fe<sub>3</sub>O<sub>4</sub>, AC is the interaction between the amount of AMT and volume of pyrrole monomer, BC is the interaction between the amount of Fe<sub>3</sub>O<sub>4</sub> and volume of pyrrole monomer, AD, is the interaction between the amount of AMT in MF and the amount of MF in PMF2, and A<sup>2</sup>, B<sup>2</sup>, and C<sup>2</sup> are the quadratic terms for each of the main factors, respectively. The equation in terms of coded factors can be used to make predictions about the response for given levels of each factor. The negative sign indicates the antagonistic effects whereas the positive sign indicates the synergistic effects.<sup>1</sup> The obtained R<sub>2</sub> values shown in Table S1 for R<sub>1</sub>, R<sub>2</sub> and R<sub>3</sub> were high (greater than 0.8) meaning that the models generated for each system have good predictability. Adequate precision of all responses was greater than 10.27 indicating adequate signals. The low standard deviations of the models for MB dye removal and dissolution also confirm the goodness of fit.

**Table S1.** Fit Statistics of the Responses on the Reduced Quadratic Model

|                                | <b>R<sub>1</sub>: % MB Dye Removal (Dark)</b> |          | <b>R<sub>2</sub>: % MB Dye Removal (Light)</b> |          | <b>R<sub>3</sub>: % Dissolution</b> |         |
|--------------------------------|-----------------------------------------------|----------|------------------------------------------------|----------|-------------------------------------|---------|
|                                | PMF1                                          | PMF2     | PMF1                                           | PMF2     | PMF1                                | PMF2    |
| <b>Std. Dev.</b>               | 6.73                                          | 0.5796   | 3.04                                           | 0.4458   | 3.21                                | 1.28    |
| <b>Mean</b>                    | 45.25                                         | 40.39    | 70.01                                          | 45.96    | 8.92                                | 5.61    |
| <b>C.V. %</b>                  | 14.88                                         | 1.44     | 4.34                                           | 0.97     | 35.94                               | 22.8    |
| <b>R<sup>2</sup></b>           | 0.8981                                        | 0.9997   | 0.9850                                         | 0.9998   | 0.7994                              | 0.9714  |
| <b>Adjusted R<sup>2</sup></b>  | 0.8370                                        | 0.9994   | 0.9997                                         | 0.9997   | 0.7082                              | 0.9599  |
| <b>Predicted R<sup>2</sup></b> | 0.6474                                        | 0.9989   | 0.8705                                         | 0.9993   | 0.5309                              | 0.955   |
| <b>Adequate Precision</b>      | 10.9146                                       | 153.5627 | 25.5967                                        | 210.6617 | 10.2713                             | 24.5496 |

The MB dye removal efficiency and dissolution of catalyst in the solution as predicted by Equation 1 to Equation 6. The results show a good correlation between the actual values and the predicted responses. Response surface contour plots for all responses are shown in Figure S-1 and Figure S2 for PMF1 and PMF2, respectively. These plots allow us to understand the relationships of the independent variables to their responses. To understand the responses for PMF1, one of the independent variables (i.e pyrrole) was held constant at its center level to show the interaction of the remaining factors (i.e. Fe<sub>3</sub>O<sub>4</sub> and MoO<sub>3</sub> precursor) towards the response. Figures S1a.i and S1b.i illustrate the surface of MoO<sub>3</sub> and Fe<sub>3</sub>O<sub>4</sub> with a maximum response on MB dye removal. An increase in the amount on both factors showed an increase of MB dye removal first followed by a decrease. This trend agrees with Equation 1 and Equation 2, where the quadratic term A<sup>2</sup> and B<sup>2</sup> had a negative value indicating a downward curvature. The effects of pyrrole and MoO<sub>3</sub> concentrations (Figure S1.a.ii and Figure S1.b.ii) and the effects of pyrrole and Fe<sub>3</sub>O<sub>4</sub> concentration (Figure S1.a.iii and 1b.iii) show a slight decrease of MB dye removal when pyrrole concentration increased. The slight upward curvature on the pyrrole was a result of the positive quadratic term (C<sup>2</sup>) in Equation 2.

The interaction of the factors in Figure S1.c.i and 1.c.iii illustrate that there is no significant effect on the dissolution of the nanomaterials. However, the interaction of the MoO<sub>3</sub> and pyrrole on the dissolution of the nanomaterial as shown in Figure S1.c.ii was significant with a positive effect. The response surface contour plot illustrates a minimax response. The graph illustrates that increasing either factor while decreasing the other leads to an increase in the dissolution of the nanomaterial. Also, increasing or decreasing both factors at the same time leads to a decrease in the dissolution response.

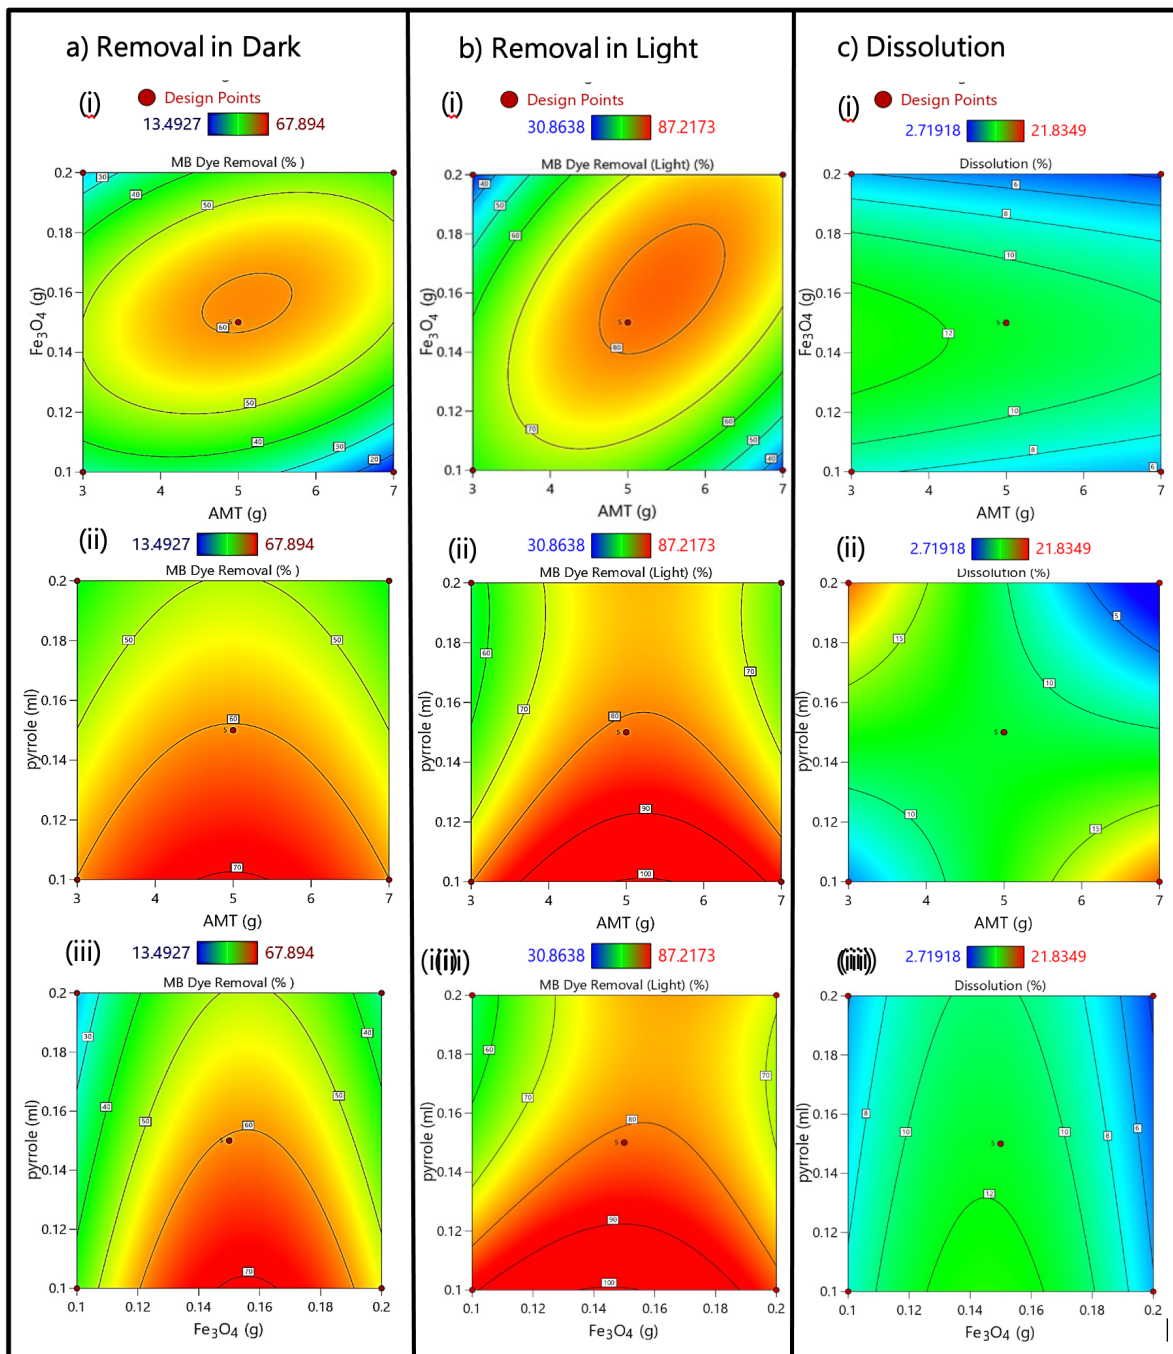

**Figure S1:** Contour plots of methylene blue dye removal by PMF1 in a) dark and b) light, and c) dissolution of PMF1 material where (i) amount of  $\text{Fe}_3\text{O}_4$  vs amount of AMT (ii) volume of pyrrole vs the amount of AMT, and (iii) volume of pyrrole vs the amount of  $\text{Fe}_3\text{O}_4$

Figure S2 shows the contour plots describing Equations (4) to (6). The MB removal in light and dark (Figure S2.a and Figure S2.b, respectively), show similar trends. The amount of MF in PMF seems to be the predominant factor as to the extent of MB removal. While the amount of

AMT results in an overall positive effect on the removal of MB (see Equations (4) and (5)), the amount of MF produced a negative effect, which was counteracted by the interaction of the amount of AMT and amount of MF in PMF. From the contour plots we can see that there was an optimum region defined for the removal of MB in the light and dark. The amount of AMT, however, was the factor that most influenced the dissolution of the material as shown in Figure S2.c This as we expected since the larger the amount of AMT was, the more molybdenum was available in the material, which could readily dissolve. However, the PANI coating could help counteract the dissolution of  $\text{MoO}_3$  when it could coat a sufficient amount of the material.

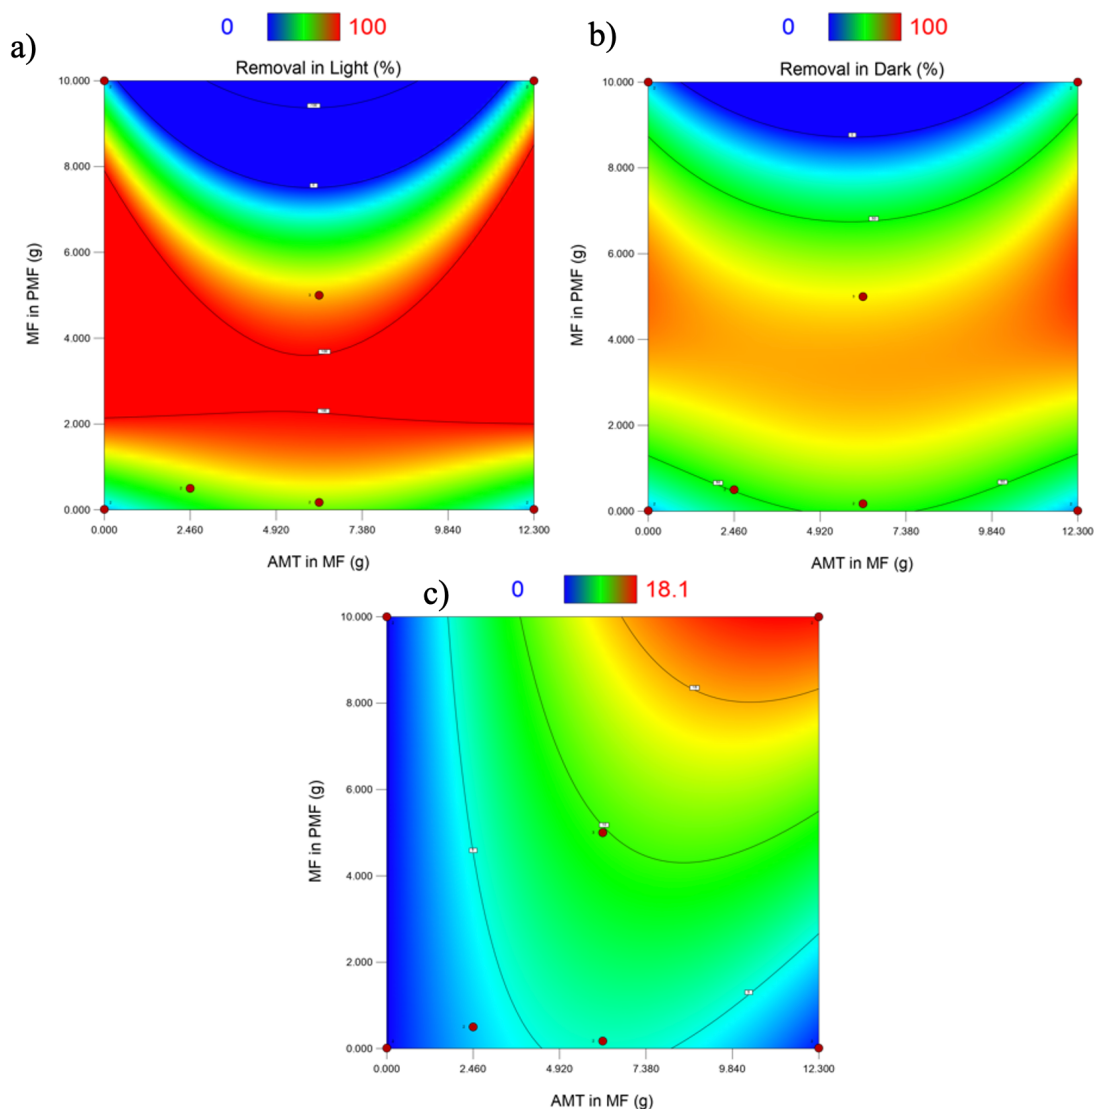

**Figure S2.** Contour plots of methylene blue dye removal by PMF2 in a) light, b) dark, and c) dissolution of PMF2 material

**Table S2.** Model Validation of the PPy@MoO<sub>3</sub>@Fe<sub>3</sub>O<sub>4</sub> (PMF1) and PANI@MoO<sub>3</sub>@Fe<sub>3</sub>O<sub>4</sub> (PMF2) synthesis from numerical optimization

| Response               | Nanomaterial | Predicted Mean (%) | Standard Deviation (%) | 95% PI low <sup>(a)</sup> (%) | Data Mean (Observed) (%) | 95% PI high <sup>(a)</sup> (%) |
|------------------------|--------------|--------------------|------------------------|-------------------------------|--------------------------|--------------------------------|
| MB Dye Removal (Dark)  | PMF1         | 66.12              | 6.73                   | 55.21                         | 70.26                    | 77.02                          |
|                        | PMF2         | 59.92              | 0.58                   | 57.60                         | 60.18                    | 62.23                          |
| MB Dye Removal (Light) | PMF1         | 90.75              | 3.04                   | 85.65                         | 95.39                    | 95.85                          |
|                        | PMF2         | 75.94              | 0.45                   | 74.17                         | 75.98                    | 77.72                          |
| Dissolution            | PMF1         | 13.17              | 3.21                   | 7.38                          | 4.12                     | 18.97                          |
|                        | PMF2         | 3.78               | 3.21                   | 1.50                          | 5.6                      | 6.07                           |

<sup>a)</sup>Confidence = 95%

**Table S3.** Comparison of our developed material with other photocatalysts in the removal of methylene blue (MB)

| Material                                                     | Material and Contaminant Concentrations     | Light Source  | Percent Removal | Time to Achieve Removal | Ref          |
|--------------------------------------------------------------|---------------------------------------------|---------------|-----------------|-------------------------|--------------|
| Bi <sub>2</sub> O <sub>3</sub> /MoO <sub>3</sub>             | 500 ppm photocatalyst in 10 ppm MB solution | Visible, 500W | 86.6%           | 120 min                 | <sup>2</sup> |
| h- MoO <sub>3</sub>                                          | 25 ppm catalyst in 10 ppm MB solution       | Visible, 350W | 19 %            | 105 min                 | <sup>3</sup> |
| AgNPs decorated microstructure ZnO                           | 600 ppm catalyst in 10 ppm MB solution      | UV, 6W        | 87.74%          | 60 min                  | <sup>4</sup> |
| TiO <sub>2</sub> /GO                                         | 1000 ppm catalyst in 0.01mM MB solution     | Visible, 450W | 51.3%           | 60 min                  | <sup>5</sup> |
| MoO <sub>3</sub> /P25                                        | 100 ppm catalyst in 15 ppm MB solution      | Visible, 110W | 38%             | 150 min                 | <sup>6</sup> |
| PPy@MoO <sub>3</sub> @Fe <sub>3</sub> O <sub>4</sub> (PMF1)  | 500 ppm catalyst in 40 ppm MB solution      | Visible, 4W   | 95.39%          | 120 min                 | (this work)  |
| PANI@MoO <sub>3</sub> @Fe <sub>3</sub> O <sub>4</sub> (PMF2) | 500 ppm catalyst in 40 ppm MB solution      | Visible, 4W   | 75.98%          | 120 min                 | (this work)  |

**Table S4.** Material structural parameters calculated from the XRD data

| Material | Crystallite size <sup>1</sup> (nm) | <sup>1</sup> Lattice strain (%) | Microstrain, <sup>2</sup> $\varepsilon$ ( $\times 10^{-3}$ ) | Dislocation density, <sup>2</sup> $\delta$ ( $\times 10^{14} \text{ m}^{-2}$ ) |
|----------|------------------------------------|---------------------------------|--------------------------------------------------------------|--------------------------------------------------------------------------------|
| MF1      | 26                                 | 0.67                            | 1.56                                                         | 21.3                                                                           |
| PMF1     | 32                                 | 0.55                            | 1.26                                                         | 13.8                                                                           |
| MF2      | 37                                 | 0.46                            | 1.06                                                         | 9.7                                                                            |
| PMF2     | 44                                 | 0.36                            | 0.89                                                         | 6.6                                                                            |

<sup>1</sup> Calculated using Scherrer calculator form X'Pert HighScore Plus software

<sup>2</sup> Calculated based from the formulas presented in literature<sup>7,8</sup>



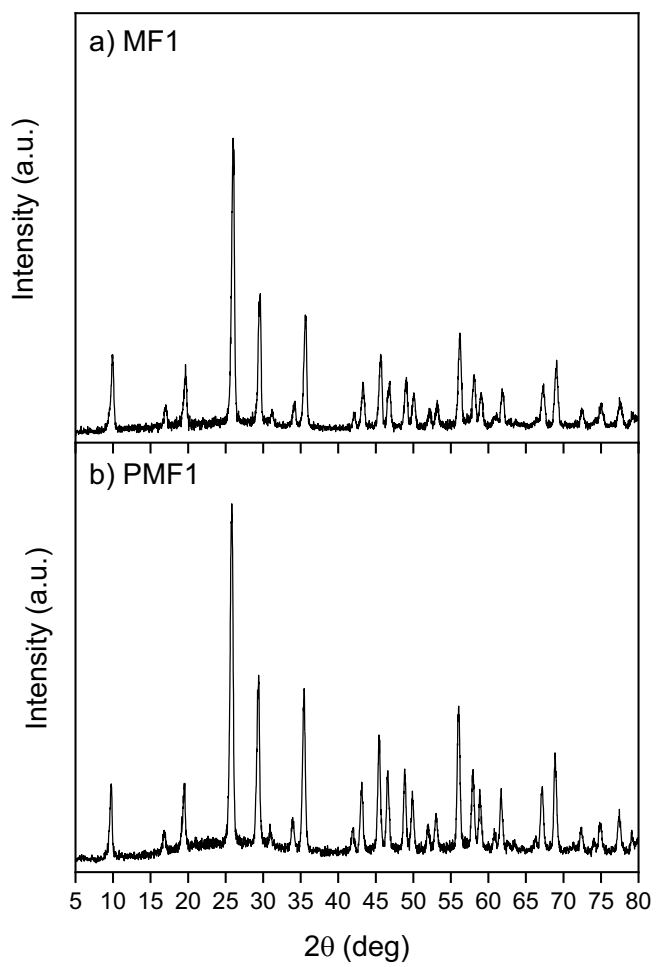

**Figure S3:** XRD Pattern of a) MF1 and b) PMF1

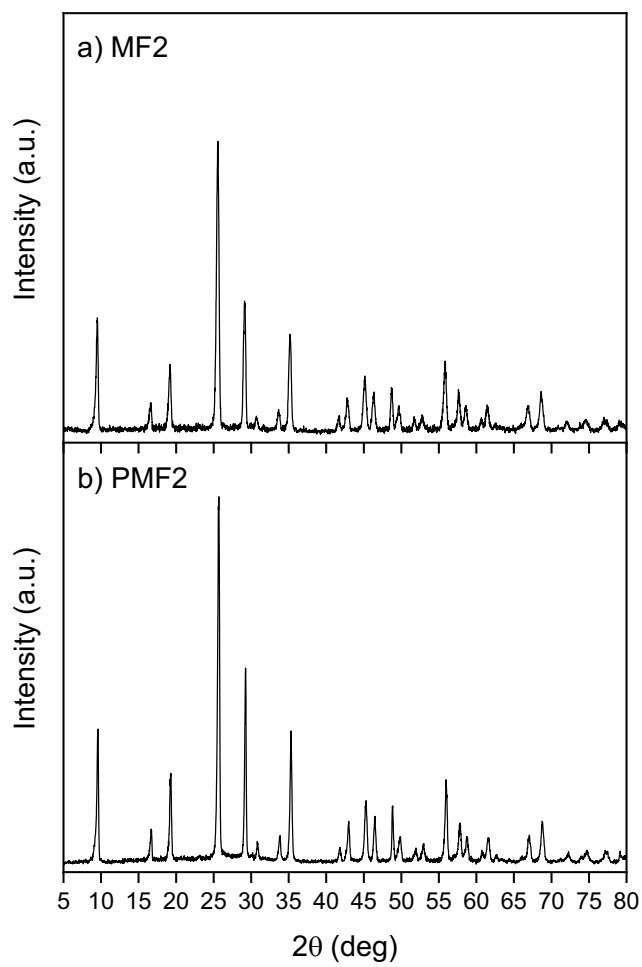

**Figure S4:** XRD Pattern of a) MF2 and b) PMF2

**Table S5.** Relative atomic concentrations from XPS

| Material | C (%) | O (%) | Mo (%) | Fe (%) | Other (%)       |
|----------|-------|-------|--------|--------|-----------------|
| MF1      | 13.6  | 60.8  | 25.3   | 0.3    |                 |
| PMF1     | 31.3  | 47.8  | 16.7   | 0.4    | N: 2.8, S: 1.0  |
| MF2      | 19.1  | 57.8  | 21.8   | 1.3    |                 |
| PMF2     | 51.2  | 33.9  | 12.8   | 0.1    | N: 1.3, Cl: 0.7 |

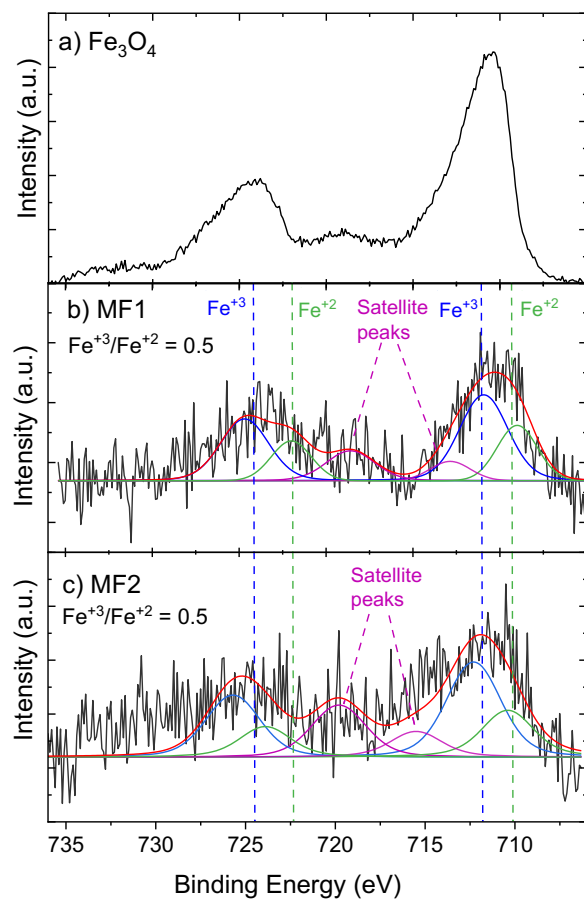

**Figure S5.** XPS Fe 2p spectra of a)  $\text{Fe}_3\text{O}_4$  and the fitted spectra of b) MF1 and c) MF2

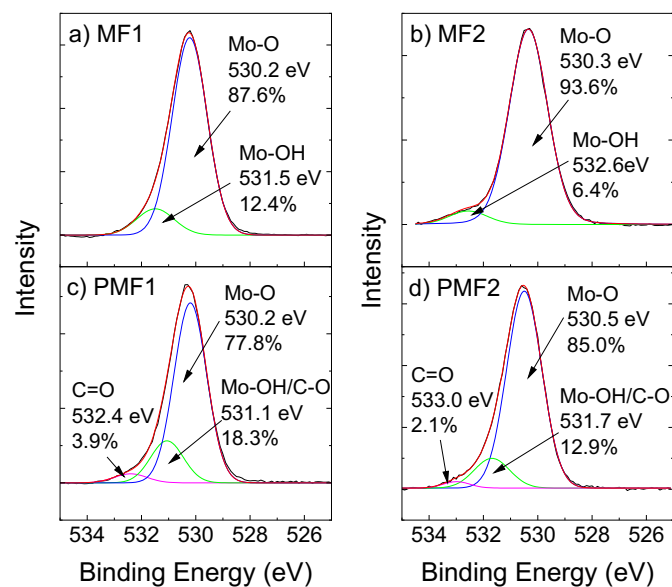

**Figure S6.** XPS O1s fitted spectra

**Table S6.** Molybdenum XPS fitting parameters

| <b>Material</b> | <b>Peak type</b>                         | <b>Peak Center<br/>(eV)</b> | <b>FWHM<br/>(eV)</b> | <b>Area</b> | <b>Concentration<br/>%</b> |
|-----------------|------------------------------------------|-----------------------------|----------------------|-------------|----------------------------|
| <b>MF1</b>      | Mo 3d <sub>5/2</sub> (Mo <sup>+6</sup> ) | 232.57                      | 1.31                 | 49196.01    | 56.0                       |
|                 | Mo 3d <sub>3/2</sub> (Mo <sup>+6</sup> ) | 235.72                      | 1.31                 | 31942.06    | 36.3                       |
|                 | Mo 3d <sub>5/2</sub> (Mo <sup>+5</sup> ) | 231.45                      | 1.21                 | 4053.00     | 4.6                        |
|                 | Mo 3d <sub>3/2</sub> (Mo <sup>+5</sup> ) | 234.60                      | 1.21                 | 2701.69     | 3.1                        |
| <b>MF2</b>      | Mo 3d <sub>5/2</sub> (Mo <sup>+6</sup> ) | 232.59                      | 1.37                 | 37399.71    | 57.3                       |
|                 | Mo 3d <sub>3/2</sub> (Mo <sup>+6</sup> ) | 235.77                      | 1.37                 | 24889.87    | 38.1                       |
|                 | Mo 3d <sub>5/2</sub> (Mo <sup>+5</sup> ) | 231.51                      | 1.27                 | 1774.23     | 2.7                        |
|                 | Mo 3d <sub>3/2</sub> (Mo <sup>+5</sup> ) | 234.66                      | 1.27                 | 1227.52     | 1.9                        |

**Table S7.** ATR-FTIR peaks and corresponding bond vibrations of Fe<sub>3</sub>O<sub>4</sub>, MoO<sub>3</sub>, MF1, PMF1, MF2, and PMF2

| Fe <sub>3</sub> O <sub>4</sub> | MoO <sub>3</sub>        | PPy                     | PANI                         | MF1                     | PMF1                    | MF2                     | PMF2                    | Functional group/assignment                                                        |
|--------------------------------|-------------------------|-------------------------|------------------------------|-------------------------|-------------------------|-------------------------|-------------------------|------------------------------------------------------------------------------------|
| -                              | -                       |                         | 1564.7 cm <sup>-1</sup>      | -                       | -                       | -                       | 1606.9 cm <sup>-1</sup> | C=C-C stretching vibrations (PANI-quinoid diamine, N=Q=N) <sup>9-12</sup>          |
| -                              | -                       | 1552.4 cm <sup>-1</sup> | -                            | -                       | 1552.0 cm <sup>-1</sup> | -                       | -                       | Pyrrole ring vibrations(C=C stretching) <sup>11-14</sup>                           |
| -                              | -                       | -                       | 1488.3 cm <sup>-1</sup>      | -                       | -                       | -                       | -                       | C=C-C aromatic ring stretching of the benzenoid diamine (N-B-N) <sup>9,10,14</sup> |
| -                              | -                       | 1461.8 cm <sup>-1</sup> | -                            | 1433.4 cm <sup>-1</sup> | 1443.5 cm <sup>-1</sup> | 1442.5 cm <sup>-1</sup> | 1442.0 cm <sup>-1</sup> | C-N stretching <sup>10,11,13,15</sup>                                              |
| -                              | 1403.5 cm <sup>-1</sup> | -                       | -                            | 1405.2 cm <sup>-1</sup> | -                       | 1405.7 cm <sup>-1</sup> | -                       | N-H bending <sup>16,17</sup>                                                       |
| -                              | -                       | 1305.1 cm <sup>-1</sup> | -                            | -                       | 1317.6 cm <sup>-1</sup> | -                       | -                       | C-H in-plane vibrations <sup>9,15</sup>                                            |
| -                              | -                       | -                       | 1296.0 cm <sup>-1</sup>      | -                       | -                       | -                       | 1305.6 cm <sup>-1</sup> | C-N stretching <sup>10,18</sup>                                                    |
| -                              | -                       | -                       | 1245.0 cm <sup>-1</sup>      | -                       | -                       | -                       | 1246.8 cm <sup>-1</sup> | C-N <sup>+</sup> stretching <sup>19,20</sup>                                       |
| -                              | -                       | 1174.5 cm <sup>-1</sup> | -                            | -                       | -                       | -                       | -                       | C-N stretching <sup>11,12</sup>                                                    |
| -                              | -                       | 1042.8 cm <sup>-1</sup> | ~1145-~1038 cm <sup>-1</sup> | -                       | -                       | -                       | -                       | C-H in plane vibrations <sup>9,13,15,19,20</sup>                                   |
| -                              | 956.1 cm <sup>-1</sup>  | -                       | -                            | 969.6 cm <sup>-1</sup>  | 965.2 cm <sup>-1</sup>  | 972.4 cm <sup>-1</sup>  | 971.5 cm <sup>-1</sup>  | M=O stretching <sup>17,21</sup>                                                    |
| -                              | 895.3 cm <sup>-1</sup>  | -                       | -                            | 895.8 cm <sup>-1</sup>  | 896.8 cm <sup>-1</sup>  | 895.8 cm <sup>-1</sup>  | 895.3 cm <sup>-1</sup>  | M=O stretching <sup>17,21</sup>                                                    |
| -                              | 878.9 cm <sup>-1</sup>  | -                       | -                            | -                       | -                       | -                       | -                       | M=O stretching <sup>17,21</sup>                                                    |
| -                              | -                       | -                       | 797.5 cm <sup>-1</sup>       | -                       | -                       | -                       | -                       | C-H out of plane bending in aromatic ring <sup>9,19,20</sup>                       |
| -                              | 568.4 cm <sup>-1</sup>  | -                       | -                            | 579.5 cm <sup>-1</sup>  | 579.0 cm <sup>-1</sup>  | 571.8 cm <sup>-1</sup>  | 565.1 cm <sup>-1</sup>  | Mo-O-Mo bending <sup>10,16,17,21</sup>                                             |
| 559.9 cm <sup>-1</sup>         | -                       | -                       | -                            | -                       | -                       | -                       | -                       | Fe-O-Fe bending <sup>22</sup>                                                      |
| -                              | 517.3 cm <sup>-1</sup>  | -                       | -                            | 517.4 cm <sup>-1</sup>  | 518.3 cm <sup>-1</sup>  | 517.8 cm <sup>-1</sup>  | 517.3 cm <sup>-1</sup>  | Mo-O-Mo bending <sup>21</sup>                                                      |

**Table S8.** Fitting curve values corresponding to equation 2 once polymerization was completed<sup>a</sup>

| Material    | Level <sup>b</sup> | G               | R <sub>g</sub> (Å) | B                  | P              | Background (cm <sup>-1</sup> ) | Reduced $\chi^2$ |
|-------------|--------------------|-----------------|--------------------|--------------------|----------------|--------------------------------|------------------|
| PPy on MF1  | 1                  | 23.9 ± 0.64     | 286.7 ± 0.95       | 4.72e-8 ± 1.62e-11 | 3.78 ± 1.52e-4 | 0.066 ± 7.26e-6                | 1.05             |
|             |                    |                 |                    |                    |                |                                |                  |
|             | 2                  | 312.4 ± 18.66   | 561.4 ± 5.56       | 8.23e-6 ± 3.40e-8  | 2.86 ± 0.007   |                                |                  |
|             |                    |                 |                    |                    |                |                                |                  |
|             | 3                  | 3.35e5 ± 1.69e3 | 2744 ± 4.05        | 4.49e-7 ± 9.77e-11 | 3.61 ± 5.30e-4 |                                |                  |
|             |                    |                 |                    |                    |                |                                |                  |
| PPy on MF2  | 1                  | 12.01 ± 0.57    | 259.9.00 ± 0.57    | 1.17e-7 ± 6.35e-11 | 3.53 ± 1.52e-4 | 0.064 ± 3.41e-6                | 1.14             |
|             |                    |                 |                    |                    |                |                                |                  |
|             | 2                  | 502.6 ± 4.93    | 635.4 ± 2.23       | 1.96e-5 ± 4.07e-8  | 2.73 ± 0.060   |                                |                  |
|             |                    |                 |                    |                    |                |                                |                  |
|             | 3                  | 5.16e5 ± 1.10e4 | 3300 ± 5.97        | 4.36e-8 ± 1.39e-11 | 3.90 ± 1.54e-4 |                                |                  |
|             |                    |                 |                    |                    |                |                                |                  |
| PANI on MF1 | 1                  | 1.37 ± 0.069    | 378.5 ± 110.46     | 3.19e-8 ± 1.66e-10 | 3.19 ± 9.63e-3 | 0.264 ± 1.41e-5                | 0.61             |
|             |                    |                 |                    |                    |                |                                |                  |
|             | 2                  | 50.71 ± 5.44    | 1245 ± 35.94       | 3.00e-5 ± 3.74e-7  | 2.03 ± 3.68e-3 |                                |                  |
|             |                    |                 |                    |                    |                |                                |                  |
|             | 3                  | 1781 ± 2.75e3   | 2965.3 ± 236.72    | 1.06e-7 ± 2.31e-9  | 3.04 ± 7.88e-3 |                                |                  |
|             |                    |                 |                    |                    |                |                                |                  |
| PANI on MF2 | 1                  | 1.87 ± 0.05     | 304.5 ± 4.43       | 8.07e-8 ± 3.26e-10 | 3.11 ± 0.005   | 0.20 ± 1.34e-5                 | 1.06             |
|             |                    |                 |                    |                    |                |                                |                  |
|             | 2                  | 370.44 ± 8.18   | 1369 ± 9.15        | 1.70e-6 ± 1.11e-8  | 2.74 ± 0.001   |                                |                  |
|             |                    |                 |                    |                    |                |                                |                  |
|             | 3                  | 3433.0 ± 1.63e3 | 2890 ± 21.03       | 1.47e-7 ± 5.11e-9  | 3.1 ± 0.007    |                                |                  |
|             |                    |                 |                    |                    |                |                                |                  |
|             | 4                  | 0               | 1e10               | 1.71e-5 ± 1.23e-7  | 3.15 ± 0.083   |                                |                  |
|             |                    |                 |                    |                    |                |                                |                  |

<sup>a</sup> G is a pre-factor for the Guinier exponential term, B is a pre-factor for the power law term, R<sub>g</sub> is the radius of gyration of the structure feature, P describes the fractal dimension of the material, and the background arises from the incoherent scattering background of the samples. The reduced  $\chi^2$  value describes the goodness of fit where the closer the value is to 1 the better the fit;

<sup>b</sup> On each material, the Level 2 structure arose from the polymer.



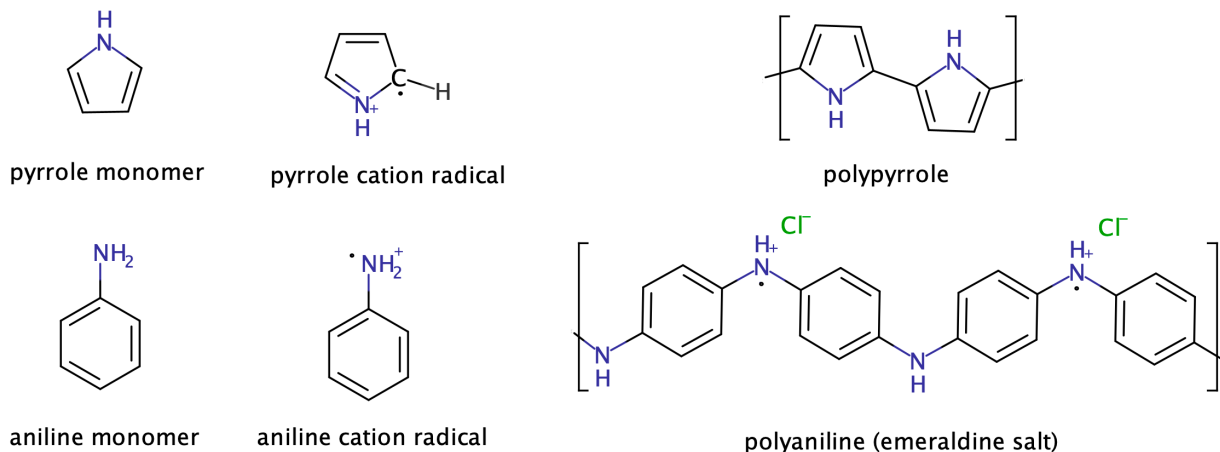

**Scheme S1.** Pyrrole and aniline monomers, cation radicals, and polymers

## References

- (1) Behera, S. K.; Meena, H.; Charaborty, S.; Meikap, B. C. Application of Response Surface Methodology (RSM) for Optimization of Leaching Parameters for Ash Reduction from Low-Grade Coal. *Int. J. Min. Sci. Technol.* **2018**, 28 (4), 621–629. <https://doi.org/10.1016/j.ijmst.2018.04.014>.
- (2) Hu, Z.; Zhou, J.; Zhang, Y.; Liu, W.; Zhou, J.; Cai, W. The Formation of a Direct Z-Scheme Bi<sub>2</sub>O<sub>3</sub>/MoO<sub>3</sub> Composite Nanocatalyst with Improved Photocatalytic Activity under Visible Light. *Chem. Phys. Lett.* **2018**, 706, 208–214. <https://doi.org/10.1016/j.cplett.2018.06.006>.
- (3) Shafi, P. M.; Dhanabal, R.; Chithambararaj, A.; Velmathi, S.; Bose, A. C.  $\alpha$ -MnO<sub>2</sub>/h-MoO<sub>3</sub> Hybrid Material for High Performance Supercapacitor Electrode and Photocatalyst. *ACS Sustain. Chem. Eng.* **2017**, 5 (6), 4757–4770. <https://doi.org/10.1021/acssuschemeng.7b00143>.
- (4) Rafaie, H. A.; Nor, R. M.; Azmina, M. S.; Ramli, N. I. T.; Mohamed, R. Decoration of ZnO Microstructures with Ag Nanoparticles Enhanced the Catalytic Photodegradation of Methylene Blue Dye. *J. Environ. Chem. Eng.* **2017**, 5 (4), 3963–3972. <https://doi.org/10.1016/j.jece.2017.07.070>.
- (5) Yunarti, R. T.; Safitri, T. N.; Dimonti, L. C. C.; Aulia, G.; Khalil, M.; Ridwan, M. Facile Synthesis of Composite between Titania Nanoparticles with Highly Exposed (001) Facet and Coconut Shell-Derived Graphene Oxide for Photodegradation of Methylene Blue. *J. Phys. Chem. Solids* **2022**, 160 (August 2021), 110357. <https://doi.org/10.1016/j.jpcs.2021.110357>.
- (6) Yang, H.; Li, X.; Wang, A.; Wang, Y.; Chen, Y. Photocatalytic Degradation of Methylene Blue by MoO<sub>3</sub> Modified TiO<sub>2</sub> under Visible Light. *Cuihua Xuebao/Chinese J. Catal.* **2014**, 35 (1), 140–147. [https://doi.org/10.1016/S1872-2067\(12\)60731-1](https://doi.org/10.1016/S1872-2067(12)60731-1).
- (7) Kamoun, O.; Mami, A.; Amara, M. A.; Vidu, R.; Amlouk, M. Nanostructured Fe,Co-Codoped MoO<sub>3</sub> Thin Films. *Micromachines* **2019**, 10 (2). <https://doi.org/10.3390/mi10020138>.
- (8) Sundeeep, D.; Gopala Krishna, A.; Ravikumar, R. V. S. S. N.; Vijaya Kumar, T.; Daniel Ephraim, S.; Pavan, Y. L. Spectral Characterization of Mechanically Synthesized MoO<sub>3</sub>-CuO Nanocomposite. *Int. Nano Lett.* **2016**, 6 (2), 119–128. <https://doi.org/10.1007/s40089-015-0178-z>.

- (9) Das, A. K.; Karan, S. K.; Khatua, B. B. High Energy Density Ternary Composite Electrode Material Based on Polyaniline (PANI), Molybdenum Trioxide ( $\text{MoO}_3$ ) and Graphene Nanoplatelets (GNP) Prepared by Sono-Chemical Method and Their Synergistic Contributions in Superior Supercapacitive Performance. *Electrochim. Acta* **2015**, *180*, 1–15. <https://doi.org/10.1016/j.electacta.2015.08.029>.
- (10) Bai, S.; Zhao, Y.; Sun, J.; Tong, Z.; Luo, R.; Li, D.; Chen, A. Preparation of Conducting Films Based on  $\alpha$ - $\text{MoO}_3$ /PANI Hybrids and Their Sensing Properties to Triethylamine at Room Temperature. *Sensors Actuators, B Chem.* **2017**, *239*, 131–138. <https://doi.org/10.1016/j.snb.2016.07.174>.
- (11) Balakumar, V.; Kim, H. H.; Manivannan, R.; Kim, H. H.; Ryu, J. W.; Heo, G.; Son, Y. A. Ultrasound-Assisted Method to Improve the Structure of  $\text{CeO}_2$ @polypropylene Core-Shell Nanosphere and Its Photocatalytic Reduction of Hazardous  $\text{Cr}^{6+}$ . *Ultrason. Sonochem.* **2019**, *59*, 104738. <https://doi.org/10.1016/j.ultsonch.2019.104738>.
- (12) Sahoo, N. G.; Jung, Y. C.; So, H. H.; Cho, J. W. Polypyrrole Coated Carbon Nanotubes: Synthesis, Characterization, and Enhanced Electrical Properties. *Synth. Met.* **2007**, *157* (8–9), 374–379. <https://doi.org/10.1016/j.synthmet.2007.04.006>.
- (13) Zhang, X.; Zeng, X.; Yang, M.; Qi, Y. Investigation of a Branchlike  $\text{MoO}_3$ /Polypyrrole Hybrid with Enhanced Electrochemical Performance Used as an Electrode in Supercapacitors. *ACS Appl. Mater. Interfaces* **2014**, *6* (2), 1125–1130. <https://doi.org/10.1021/am404724u>.
- (14) Razalli, R. L.; Abdi, M. M.; Tahir, P. M.; Moradbak, A.; Sulaiman, Y.; Heng, L. Y. Polyaniline-Modified Nanocellulose Prepared from Semantan Bamboo by Chemical Polymerization: Preparation and Characterization. *RSC Adv.* **2017**, *7* (41), 25191–25198. <https://doi.org/10.1039/c7ra03379f>.
- (15) Cetiner, S.; Karakas, H.; Ciobanu, R.; Olariu, M.; Kaya, N. U.; Unsal, C.; Kalaoglu, F.; Sarac, A. S. Polymerization of Pyrrole Derivatives on Polyacrylonitrile Matrix, FTIR-ATR and Dielectric Spectroscopic Characterization of Composite Thin Films. *Synth. Met.* **2010**, *160* (11–12), 1189–1196. <https://doi.org/10.1016/j.synthmet.2010.03.007>.
- (16) Chithambararaj, A.; Sanjini, N. S.; Bose, A. C.; Velmathi, S. Flower-like Hierarchical h- $\text{MoO}_3$ : New Findings of Efficient Visible Light Driven Nano Photocatalyst for Methylene Blue Degradation. *Catal. Sci. Technol.* **2013**, *3* (5), 1405–1414. <https://doi.org/10.1039/c3cy20764a>.
- (17) Wongkrua, P.; Thongtem, T.; Thongtem, S. Synthesis of h- and  $\alpha$ - $\text{MoO}_3$  by Refluxing and Calcination Combination: Phase and Morphology Transformation, Photocatalysis, and Photosensitization. *J. Nanomater.* **2013**, *2013*. <https://doi.org/10.1155/2013/702679>.
- (18) Anilkumar, K. R.; Parveen, A.; Badiger, G. R.; Ambika Prasad, M. V. N. Effect of Molybdenum Trioxide ( $\text{MoO}_3$ ) on the Electrical Conductivity of Polyaniline. *Phys. B Condens. Matter* **2009**, *404* (12–13), 1664–1667. <https://doi.org/10.1016/j.physb.2009.01.046>.
- (19) Shao, W.; Jamal, R.; Xu, F.; Ubul, A.; Abdiryim, T. The Effect of a Small Amount of Water on the Structure and Electrochemical Properties of Solid-State Synthesized Polyaniline. *Materials (Basel)*. **2012**, *5* (10), 1811–1825. <https://doi.org/10.3390/ma5101811>.
- (20) Lissarrague, M. H.; Lamanna, M. E.; D'Accorso, N. B.; Goyanes, S. Effects of Different Nucleating Particles on Aniline Polymerization. *Synth. Met.* **2012**, *162* (11–12), 1052–1058. <https://doi.org/10.1016/j.synthmet.2011.12.018>.

- (21) Peña-Bahamonde, J.; Wu, C.; Fanourakis, S. K.; Louie, S. M.; Bao, J.; Rodrigues, D. F. Oxidation State of Mo Affects Dissolution and Visible-Light Photocatalytic Activity of MoO<sub>3</sub> Nanostructures. *J. Catal.* **2020**, *381*, 508–519. <https://doi.org/10.1016/j.jcat.2019.11.035>.
- (22) Yusoff, A. H. M.; Salimi, M. N.; Jamlos, M. F. Synthesis and Characterization of Biocompatible Fe<sub>3</sub>O<sub>4</sub> Nanoparticles at Different PH. *AIP Conf. Proc.* **2017**, *1835* (April 2017), 1–5. <https://doi.org/10.1063/1.4981832>.
